# Supplementary material for: Deducing acidification rates based on short-term time series
Source: PubMed Central journal article supplement (PMC4648385; doi:10.1038/srep11517), 2015-07-06
Supplement: srep11517-s1.pdf [file srep11517-s1.pdf]

# Supplementary Information

## Deducing acidification rates based on short-term time series

Hon-Kit Lui and Chen-Tung Arthur Chen\*

Department of Oceanography,

National Sun Yat-Sen University, Kaohsiung 80424, Taiwan.

\*Corresponding author

Tel: +886-7-525-5136;

Email: ctchen@mail.nsysu.edu

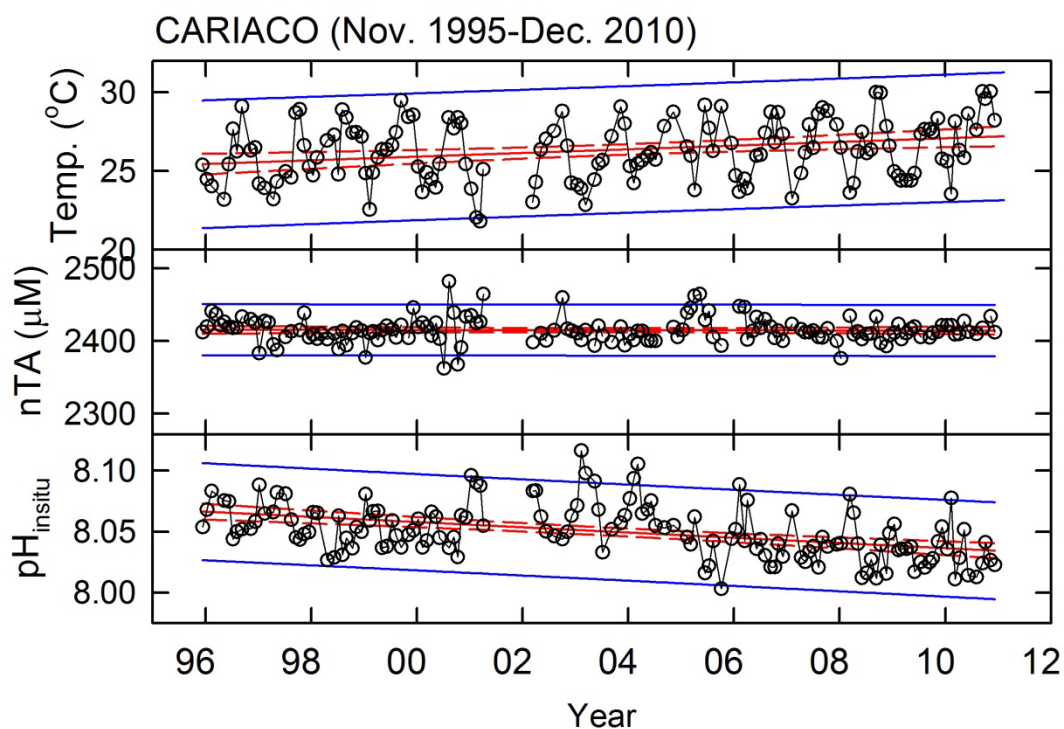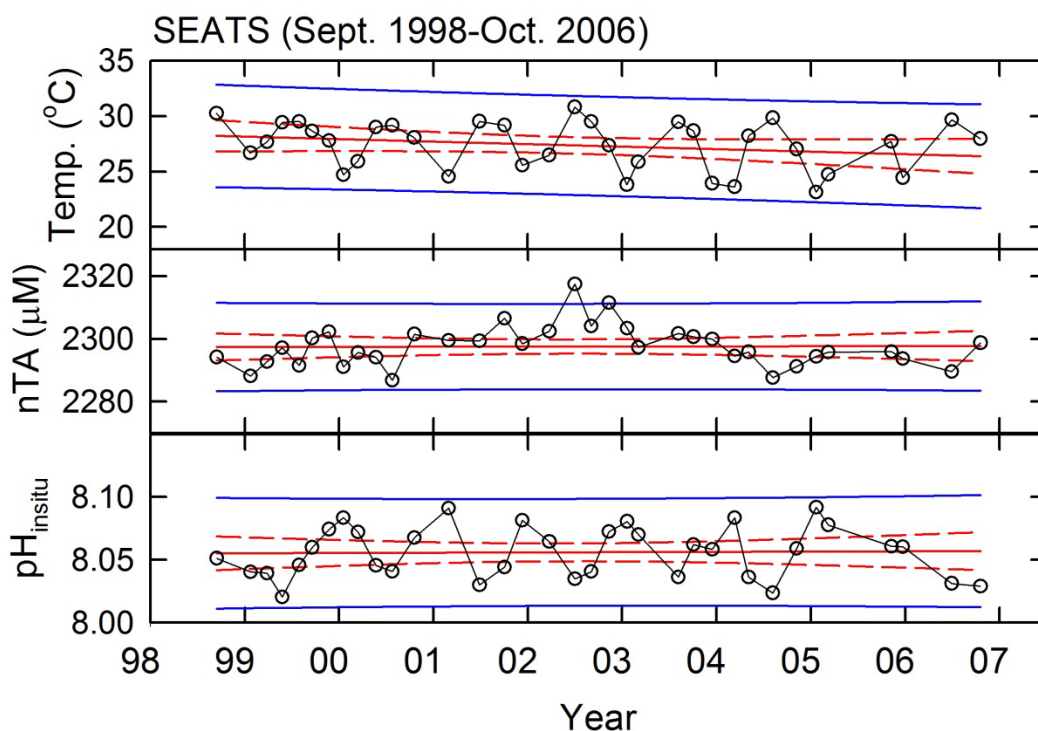

Supplementary Figure S1. Time series of temperature, normalized total alkalinity (nTA) and  $\text{pH}_{\text{in situ}}$  at CARIACO and SEATS. The red solid and dashed lines are the linear regressions and 95 % confidence intervals, respectively, while blue lines are the 95% prediction intervals of linear regressions. Rates of temporal changes in temperature, nTA and  $\text{pH}_{\text{in situ}}$  at CARIACO and SEATS are shown in Table S1.

Supplementary Table S1. The observed surface seawater  $\beta_{pH}$ ,  $\beta_T$  and  $\beta_{nTA}$  at various time-series stations.

| Time series study                              | Studied Period | $\beta_{pH}$<br>( $\times 10^{-3}$ pH unit yr <sup>-1</sup> ) | $\beta_T$<br>(°C yr <sup>-1</sup> )  | $\beta_{nTA}$<br>( $\mu\text{molkg}^{-1}$ yr <sup>-1</sup> ) |
|------------------------------------------------|----------------|---------------------------------------------------------------|--------------------------------------|--------------------------------------------------------------|
| BATS <sup>1</sup>                              | 1983-2005      | -1.7±0.3                                                      | 0.017±0.030                          | 0.06±0.04                                                    |
| CARIACO <sup>a</sup> (Figure S1)               | 1995-2010      | -2.14±0.37                                                    | 0.093±0.034                          | -0.067±0.305                                                 |
| CARIACO <sup>2</sup>                           | 1996-2008      |                                                               |                                      | 0.1±0.33                                                     |
| CARIACO<br>(deseasoned)                        | 1995-2014      | -2.5±0.4 <sup>3</sup>                                         | 0.1±0.04<br>(1996-2008) <sup>2</sup> |                                                              |
| ESTOC <sup>4,5</sup>                           | 1995-2004      | -1.4±0.7                                                      | 0.002±0.019                          | Reported to have no observable change                        |
| ESTOC <sup>b</sup><br>(Figure 1, blue crosses) | 1995-2009      | -1.84±0.39                                                    | 0.023±0.039                          | -0.028±0.039                                                 |
| ESTOC <sup>b</sup><br>(Figure 1, red circles)  | 1995-2009      | 1.61±0.37                                                     | -0.273±0.036                         |                                                              |
| HOT <sup>6</sup>                               | 1988-2007      | -1.9±0.2                                                      | 0.026±0.016                          | -0.06±0.06                                                   |
| SEATS <sup>c</sup> (Figure S1)                 | 1998-2006      | 0.206±1.50                                                    | -0.226±0.157                         | 0.04±0.48                                                    |
| 137 °E <sup>7</sup>                            | 1983-2007      | Winter: -1.8±0.2<br>Summer: -1.3±0.5                          | 0.02±0.02<br>-0.01±0.02              | Reported to have no observable change                        |

<sup>a</sup>Data taken from the Institute of Marine Remote Sensing, College of Marine Science, University of South Florida.

<http://www.imars.usf.edu/CAR/>

<sup>b</sup>Data taken from Gonzalez-Davila and Santana-Casiano<sup>8</sup>.

<sup>c</sup>Data provided by the Ocean Data Bank (ODB), Ministry of Science and Technology, Taiwan.

Supplementary Table S2. SLR equations of the  $\text{pH}_{\text{insitu}}$  and  $T$  time series at various time-series stations. (Units:  $T$  is  $^{\circ}\text{C}$ ,  $t$  is year)

| Station | Year  | $\text{pH} = \text{pH}^{\circ} + \beta_{\text{pH}}(t - 1988)$<br>$T = T^{\circ} + \beta_T(t - 1988)$ | Standard error | $R^2$  | n   |
|---------|-------|------------------------------------------------------------------------------------------------------|----------------|--------|-----|
| BATS    | 1991- | $\text{pH} = 8.1297 - 0.0022(t - 1988)$                                                              | 0.034          | 0.122  | 215 |
|         | 2010  | $T = 22.85 + 0.033(t - 1988)$                                                                        | 3.10           | 0.004  |     |
| CARIACO | 1995- | $\text{pH} = 8.0835 - 0.00214(t - 1988)$                                                             | 0.020          | 0.194  | 144 |
|         | 2010  | $T = 24.82 + 0.093(t - 1988)$                                                                        | 1.86           | 0.049  |     |
| ESTOC   | 1995- | $\text{pH} = 8.1155 - 0.00184(t - 1988)$                                                             | 0.020          | 0.135  | 144 |
|         | 2009  | $T = 20.46 + 0.023(t - 1988)$                                                                        | 1.96           | 0.002  |     |
| HOT     | 1988- | $\text{pH} = 8.1172 - 0.00183(t - 1988)$                                                             | 0.014          | 0.399  | 222 |
|         | 2010  | $T = 24.68 + 0.015(t - 1988)$                                                                        | 1.20           | 0.006  |     |
| SEATS   | 1998- | $\text{pH} = 8.0531 + 0.000206(t - 1988)$                                                            | 0.021          | 0.0006 | 35  |
|         | 2006  | $T = 30.63 - 0.226(t - 1988)$                                                                        | 2.17           | 0.059  |     |

## References:

- 1 Bates, N. R. Interannual variability of the oceanic CO<sub>2</sub> sink in the subtropical gyre of the North Atlantic Ocean over the last 2 decades. *J. Geophys. Res.-Oceans* **112**, doi:C09013 10.1029/2006jc003759 (2007).
- 2 Astor, Y. M. *et al.* Interannual variability in sea surface temperature and fCO<sub>2</sub> changes in the Cariaco Basin. *Deep-Sea Res. Part II-Top. Stud. Oceanogr.* **93**, 33-43, doi:10.1016/j.dsr2.2013.01.002 (2013).
- 3 Bates, N. R. *et al.* A time-series view of changing ocean chemistry due to ocean uptake of anthropogenic CO<sub>2</sub> and ocean acidification. *Oceanography* **27**, 126-141, doi:10.5670/oceanog.2014.16 (2014).
- 4 Gonzalez-Davila, M., Santana-Casiano, J. M., Rueda, M. J. & Llinas, O. The water column distribution of carbonate system variables at the ESTOC site from 1995 to 2004. *Biogeosciences* **7**, 3067-3081, doi:10.5194/bg-7-3067-2010 (2010).
- 5 Santana-Casiano, J. M., Gonzalez-Davila, M., Rueda, M. J., Llinas, O. & Gonzalez-Davila, E. F. The interannual variability of oceanic CO<sub>2</sub> parameters in the northeast Atlantic subtropical gyre at the ESTOC site. *Glob. Biogeochem. Cycle* **21**, doi:Gb101510.1029/2006gb002788 (2007).
- 6 Dore, J. E., Lukas, R., Sadler, D. W., Church, M. J. & Karl, D. M. Physical and biogeochemical modulation of ocean acidification in the central North Pacific. *Proc. Natl. Acad. Sci. U. S. A.* **106**, 12235-12240, doi:10.1073/pnas.0906044106 (2009).
- 7 Midorikawa, T. *et al.* Decreasing pH trend estimated from 25-yr time series of carbonate parameters in the western North Pacific. *Tellus Ser. B-Chem. Phys. Meteorol.* **62**, 649-659, doi:10.1111/j.1600-0889.2010.00474.x (2010).
- 8 Gonzalez-Davila, M. & Santana-Casiano, J. M. Sea Surface and Atmospheric fCO<sub>2</sub> data measured during the ESTOC Time Series cruises from 1995-2009. [http://cdiac.ornl.gov/ftp/oceans/ESTOC\\_data/](http://cdiac.ornl.gov/ftp/oceans/ESTOC_data/). Carbon Dioxide Information Analysis Center, Oak Ridge National Laboratory, US Department of Energy, Oak Ridge, Tennessee., doi:10.3334/CDIAC/otg.TSM\_ESTOC (2009).
